# Supplementary material
Source: publisher figshare collection journal article supplement (https://acs.figshare.com/ndownloader/files/4107097)
Supplement: Supplementary file 1 [file 4107097]

#### Supporting Information (i): High Salt systems with $M^{III}$ as background ions.

Addition of 1M  $Al^{3+}$  or  $Fe^{3+}$  completely dissolves  $FePP_i$ , see Figure A1. This might be caused by the lowered pH, see Table A2.

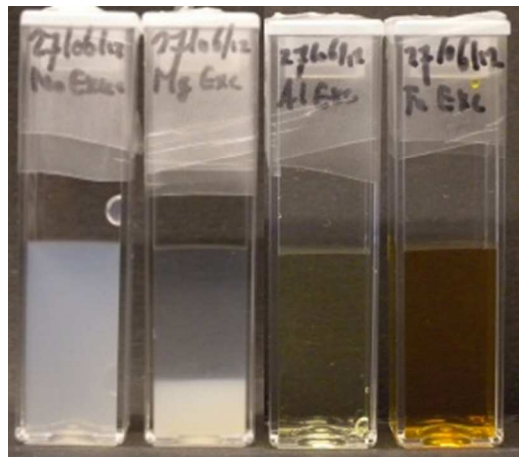

Figure A1.  $M^{II}/M^{III}$  excess dispersions: (a) Freshly prepared  $FePP_i$  (b) 1M  $MgCl_2$ , (c) 1M  $AlCl_3$ , (d) 1M  $FeCl_3$ .

Table A2. pH of  $FePP_i$  dispersions.

| Added cation  | Added concentration (M) | pH   |
|---------------|-------------------------|------|
| No salt*      | 0                       | 3.30 |
| $Li^+$        | 2                       | 2.84 |
| $K^+$         | 2                       | 2.69 |
| $Mg^{2+}$     | 1                       | 2.68 |
| $Al^{3+}$     | 1                       | 1.79 |
| $Fe^{3+}$     | 1                       | 0.81 |
| $Fe^{3+}$ 10% | 0.0002                  | 2.80 |

\*No additional salt: freshly prepared  $FePP_i$  system.

#### Supporting Information (ii): Fe or $PP_i$ deficient systems

$Fe/PP_i$  deficient samples were prepared by reducing the amount of the respective salt by 10%. The  $PP_i$  deficient systems had a positive zeta-potential insufficient to keep the system dispersed, see Table A1. The Fe deficient system remained stable but did not have an increased zeta-potential that might be expected for an electrocratic system.

Table A1. 10% Fe or  $PP_i$  deficient systems

|                | Size (nm) | $\zeta$ -potential (mV) | Conductivity (mS/cm) |
|----------------|-----------|-------------------------|----------------------|
| Stoichiometry  | 210       | -37                     | 2.2                  |
| Fe deficit     | 250       | -40                     | 2.1                  |
| $PP_i$ deficit | *20000    | *4.2                    | 2.5                  |

\*Indicative values, size and measurement polydispersity too large for accurate analysis.

### Supporting Information (iii) Solubility of iron(III) pyrophosphate

The solubility of iron pyrophosphate at pH 3.8 and a solid content of 25 g/L (0.14 M iron, 0.11 M pyrophosphate assuming pure  $\text{FePP}_i$ ) was determined by ICP-AES analysis to be 0.61 mM iron and 0.67 mM pyrophosphate. Solubility of similar materials have been shown to vary with experimental conditions such as solid content[1].

### References

[1] Leach, S. A. Electrophoresis of Synthetic Hydroxyapatite. *Arch. Oral Biol.* **1960**, 3, 48-56.
